# Supplementary material for: Angle-controlled arrangement of single-walled carbon nanotubes solubilised by 8-quinolinol metal chelate derivatives on mica
Source: Royal Society of Chemistry journal article supplement (doi:10.1039/b715960a), 2008-01-01
Supplement: b715960a.pdf [file b715960a.pdf]

## Supporting Information

### Angle-controlled arrangement of single-walled carbon nanotubes solubilised by 8-quinolinol metal chelate derivatives on mica†

Kazuyuki Nobusawa,<sup>a</sup> Atsushi Ikeda,<sup>\*a</sup> Yasunori Tanaka,<sup>a</sup> Mineo Hashizume,<sup>a</sup> Jun-ichi Kikuchi,<sup>a</sup> Michihiro Shirakawa,<sup>b</sup> Tatsuya Kitahara,<sup>b</sup> Norifumi Fujita,<sup>b</sup> and Seiji Shinkai<sup>b</sup>

<sup>a</sup> Graduate School of Materials Science, Nara Institute of Science and Technology, Ikoma, Nara 630-0192, Japan

<sup>b</sup> Department of Chemistry and Biochemistry, Graduate School of Engineering, Kyushu University, Fukuoka 819-0395, Japan

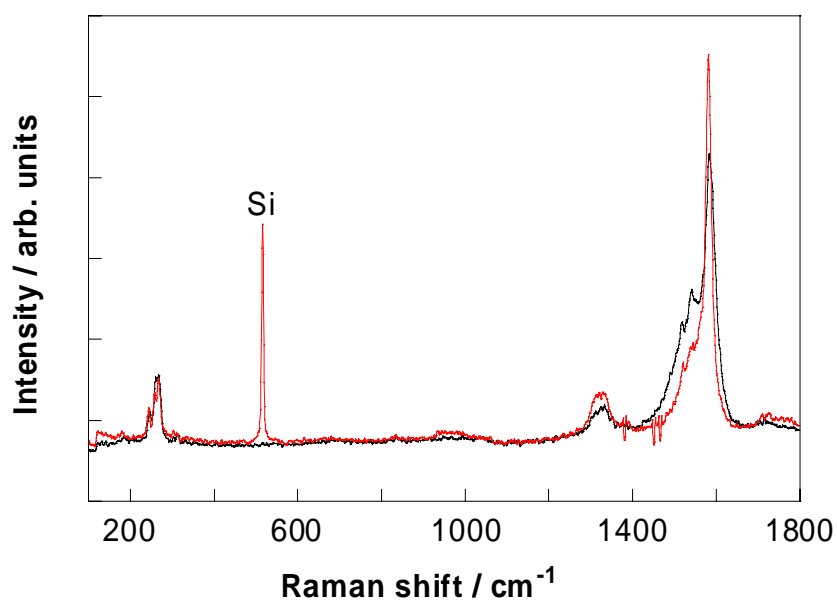

**Fig. S1** Raman spectra of thin film of pristine SWNTs (black line) and the 2Cu-SWNT mixture (red line).

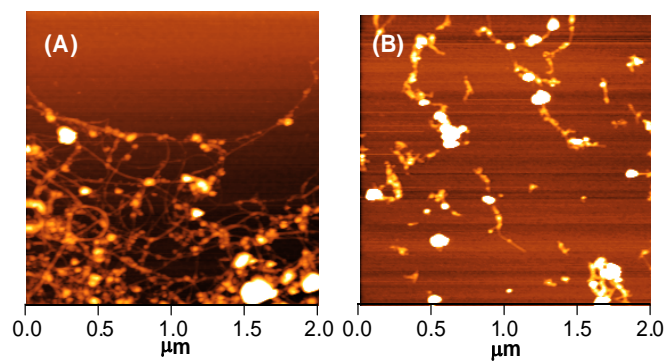

**Fig. S2** Tapping mode AFM images of (A) the **2Cu**·SWNT mixture prepared using the sonication method and (B) the **2Pd**·SWNT mixture prepared using the HSVM method on mica.

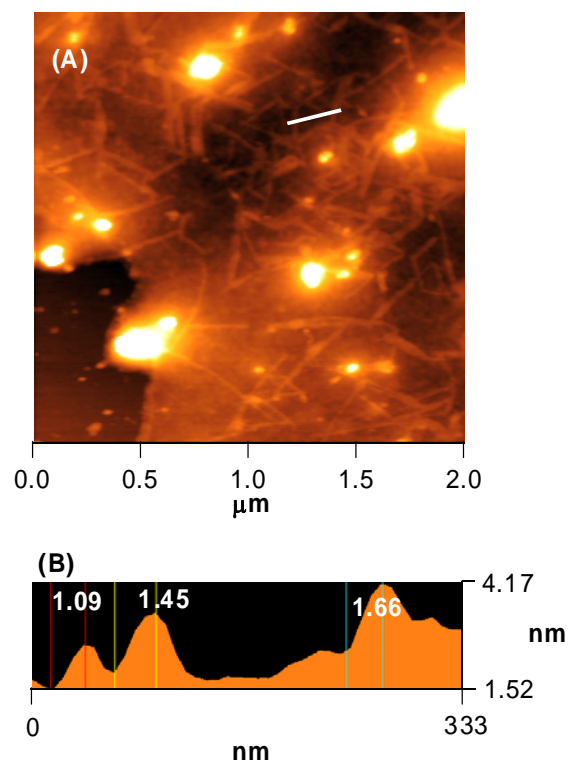

**Fig. S3** Tapping mode AFM images of (A) a substrate in which an aqueous solution of SWNTs was dropped on mica previously deposited by  $2\text{Cu}$  using a spin-coated method on mica. (B) The height profile of the  $2\text{Cu}$ -SWNT mixture is measured along the white line in (A).

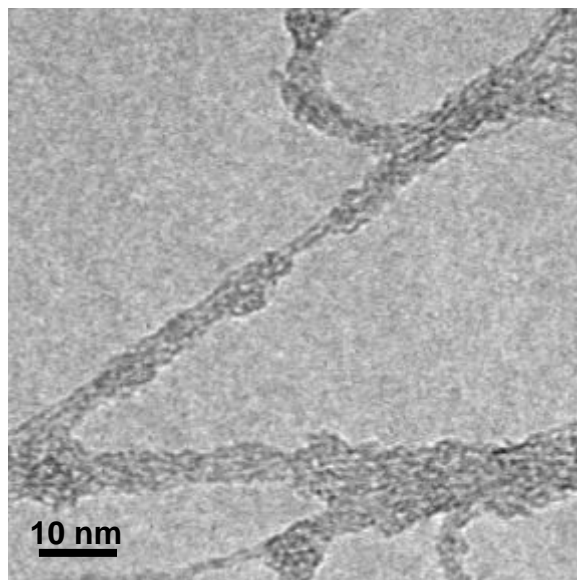

**Fig. S4** A TEM image of the  $2\text{Cu}\cdot\text{SWNT}$  complex.
